# Supplementary material for: Feasibility and safety of a robotic-assisted optical navigation system for pulmonary nodule percutaneous cryoablation: a prospective, single-center, single-arm pilot study
Source: Research Square preprint supplement (doi:10.21203/rs.3.rs-7395827/v1), 2025-09-30
Supplement: Supplementary file 1 [file 1436491305d9cd4aa9fe21dc.docx]

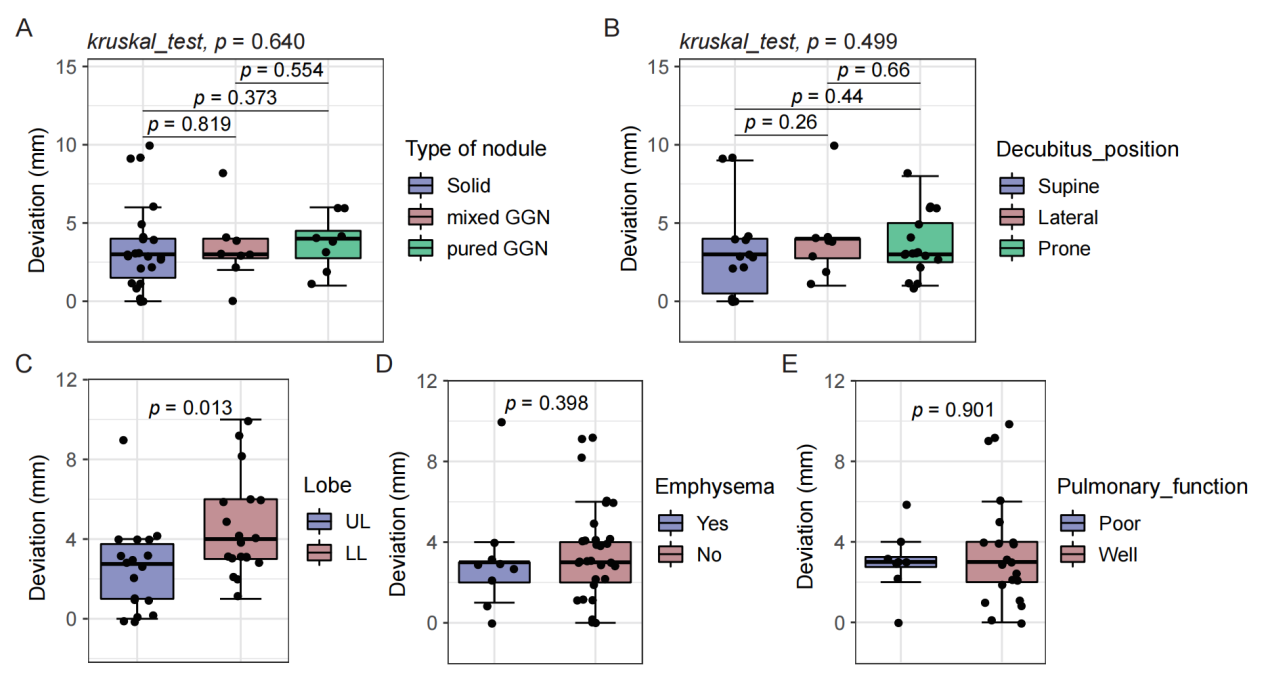


**Figure S1. Stratified analyses of the correlations between pulmonary nodule features, pulmonary function, pulmonary background disease, and accuracy.** (A) Nodule types. (B) Decubitus positions. (C) Lobar location. (D) Presence or absence of emphysema. (E) Different pulmonary function statuses.


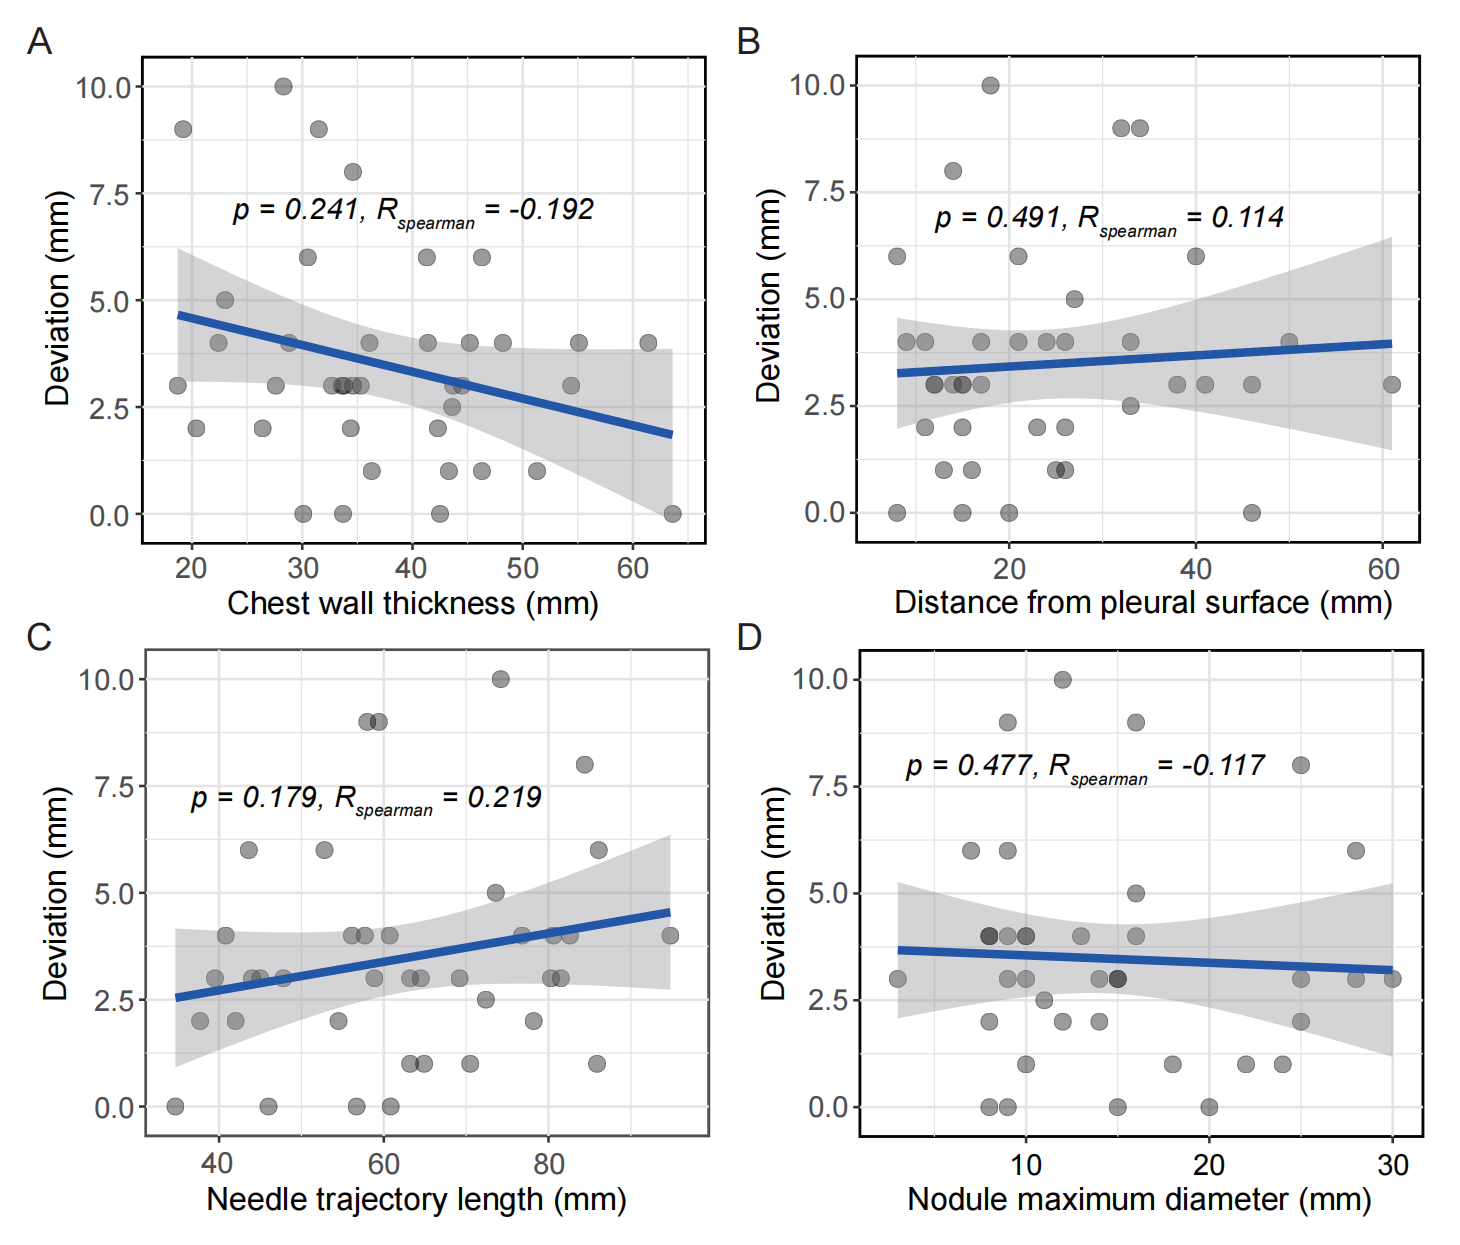


**Figure S2. Stratified analyses of the correlations between pulmonary nodule features and accuracy.** (A) Chest wall thickness. (B) Distance from the outer edge of the nodule to pleura. (C) Needle trajectory length. (D) Nodule maximum diameter.


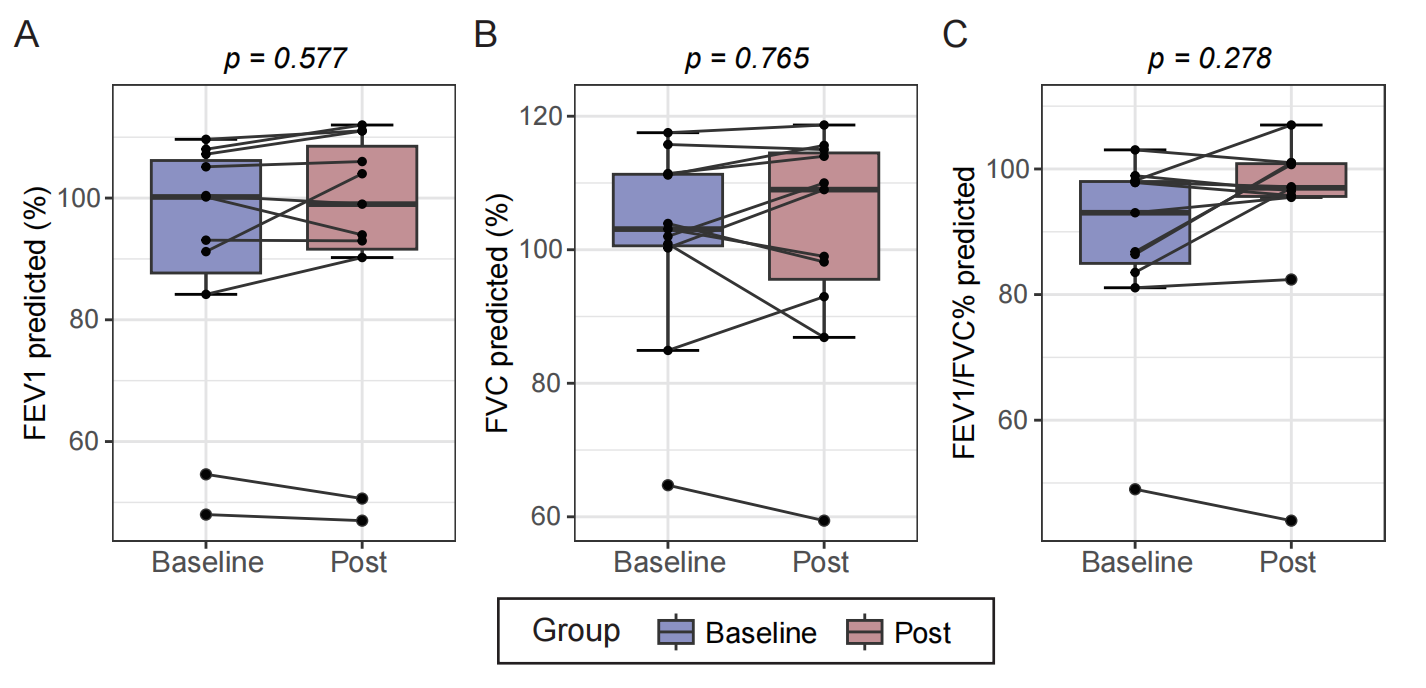


**Figure S3. Dynamic changes in pulmonary function between baseline and postoperative periods following robotic-assisted cryoablation.** (A) Forced expiratory volume in the first second as a percentage of predicted (FEV1% predicted). (B) Forced vital capacity as a percentage of predicted (FVC% predicted). (C) FEV1 to FVC ratio as a percentage of predicted (FEV1/FVC% predicted).
